# Supplementary material
Source: HighWire-hosted journal article supplement (https://jnm.snmjournals.org/highwire/filestream/94577/field_highwire_adjunct_files/0/135301_Supplemental_Data.pdf)
Supplement: 135301_Supplemental_Data.pdf [file 135301_Supplemental_Data.pdf]

## Supplemental Appendix A

The results show that although the  $EUD_{KB}$  formalism correctly described the toxicity risk in partial-liver-volume EBRT, for which the dose was uniform in the targeted liver volume (Table 1), it failed to explain the toxicity risk in liver radioembolization, for which the observed  $BED_{50}$  resulted in  $EUD_{KB50}$  about 5-fold higher than in EBRT (Table 1).

This result arises from the incorrect treatment of high doses in the  $EUD_{KB}$  formalism. A BED higher than 200 Gy delivered to a lobule will definitely kill the lobule. Thus, all BED values higher than 200 Gy delivered to one lobule should contribute similarly to the  $EUD_{KB}$ . Such is not the case using a microscale dose distribution. Supplemental Figure 1 clearly shows that lobules that trapped several microspheres and whose portal triads received a BED higher than 500 Gy contributed significantly to the  $EUD_{KB}$  although they represented a minor lobule fraction not critical for liver recovery. Only a single lobule with a  $BED \rightarrow \infty$  results in a liver  $EUD_{KB} \rightarrow \infty$  when  $a > 0$  ( $a = 1.06$ ). Even for  $a < 0$ , this issue would not be resolved, as in that case only a single element having a  $BED \approx 0$  results in a tissue  $EUD_{KB} \approx 0$ . These two limits clearly show that the  $EUD_{KB}$  formalism is not adaptable to microscale dose distributions.

## Supplemental Appendix B

The  $EUD_{JH}$  formalism succeeded in giving a similar  $EUD_{50}$  for the dose toxicity risk observed in whole-liver EBRT and in resin or glass microsphere radioembolization. However, the  $EUD_{JH}$  formalism failed in predicting the different  $BED_{50}$  values observed in partial-liver-volume EBRT, resulting in a drop in  $EUD_{JH50}$  by 11 Gy when preserving a third of the liver volume from radiation.

This result arises from the fact that a hepatic lobule is not a unique cell but a functional subunit, that is, a real tissue requiring the cooperation of all its cells to work and survive. As a result, the lobule survival fraction is not described by an exponential curve; instead, the dose–failure risk relationship of a lobule should exhibit a sigmoid shape as do all organs.

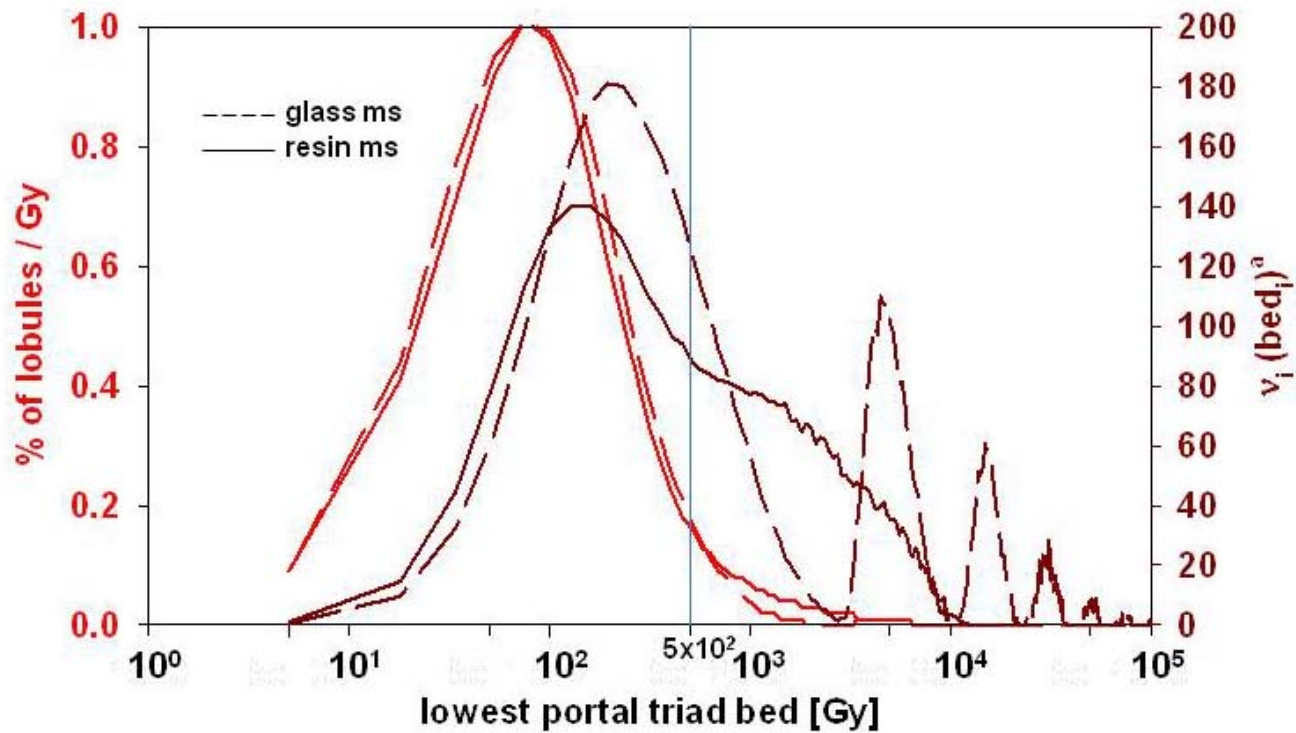

**Supplemental Figure 1.** Dose contribution to EUD. Red lines: simulated total lobule fractions as a function of the minimal BED delivered to their 6 portal triads derived for the resin (solid lines) and glass (dashed lines) microspheres. Brown lines: contributions to the EUD as a function of the lobule dose bed. Although the lobules receiving more than 500 Gy to their portal triads represent a minor fraction, their contribution to the EUD is significant.
